# Supplementary material
Source: Springer Nature journal article supplement (https://www.springermedizin.de/resource/supplementary/13012_2013_729_MOESM6_ESM.pdf/9630546)
Supplement: MOESM6 [file 9630546]

Medical evidence

Evidence-based Decision Support (DS) rules in the EBMeDS service in April 2009 (N = 107 available)

Local piloting in Sipoo

Excluded DS rules n = 11, not triggered in Sipoo

DS rules accepted for implementation in Sipoo (n = 96)

Excluded DS rules n = 23, either not triggered or not calculable

73 DS rules:  
Producing 154 possible automatic reminders

14 DS rules excluded because of technical issues and other reasons

59 DS rules functioning as planned:  
Producing 116 possible automatic reminders
